# Supplementary material for: Basal aurora kinase B activity is sufficient for histone H3 phosphorylation in prophase
Source: PubMed Central journal article supplement — Biol Open. 2013 Feb 14;2(4):379–86. doi: 10.1242/bio.20133079 (PMC3625866; doi:10.1242/bio.20133079), 2013-02-14
Supplement: supp_bio.20133079_bio.20133079-s1.pdf [file supp_bio.20133079_bio.20133079-s1.pdf]

## Supplementary Material

Ly-Thuy-Tram Le et al. doi: 10.1242/bio.20133079

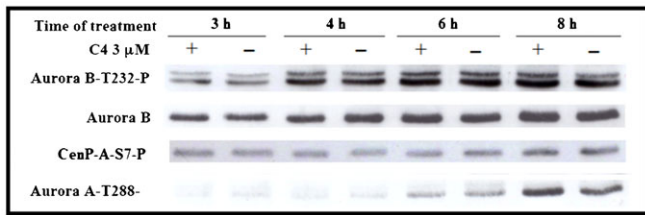

**Fig. S1. Kinetics of phosphorylation.** Western blots were realised on cells synchronized at S-phase and then released for varying times. The phosphorylations of aurora kinase B (T232), CenP-A (Ser 7), and aurora kinase A (Thr 288) are also shown in control (-) and C4 treated cells (+). Aurora kinase B detection is used for estimation of the amount of mitotic cells.

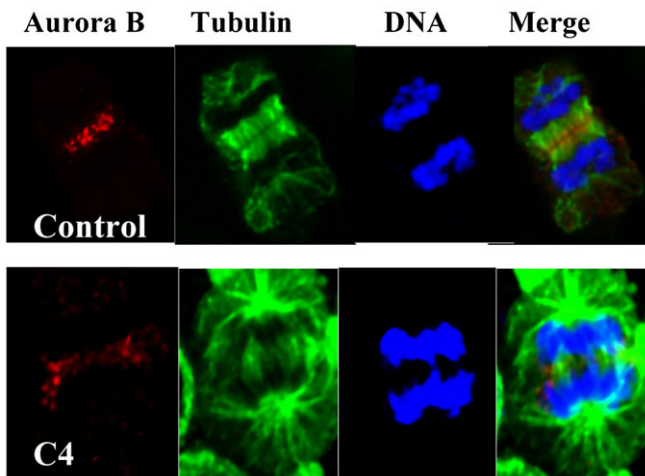

**Fig. S2. Localisation of aurora B kinase and  $\alpha$ -tubulin in late anaphase in control and C4 treated HeLa cells.**

**Table S1. Analysis of WB signals.** The signals of Western blots were quantified by the Image J software. Two determinations were done for each band. First we analyzed the kinetic of histone H3 phosphorylations (on Ser 10 and 28) presented in Fig. 2A, then we quantified the signal of aurora kinase B in metaphase (blot shown in supplementary material Fig. S1). Briefly the integrate density (area $\times$ intensity) was measured twice for each signal and the average is reported in the table. Then the tubulin signals were used to calculate the relative intensity.

| Kinetic | Tubulin integrated density | Relative intensity tubulin | H3-Ser10 integrated density | Relative intensity H3-Ser 10 | H3-Ser28 integrated density | Relative intensity H3-Ser 28 |
|---------|----------------------------|----------------------------|-----------------------------|------------------------------|-----------------------------|------------------------------|
| Co-3h   | 3386                       | 100                        | 1661                        | 49 $\pm$ 1                   | 349                         | 10 $\pm$ 0.5                 |
| C4-3h   | 3387                       | 100                        | 327                         | 10 $\pm$ 0.2                 | 23                          | 1 $\pm$ 0.1                  |
| Co-4h   | 3644                       | 100                        | 3607                        | 99 $\pm$ 2                   | 2251                        | 61 $\pm$ 1                   |
| C4-4h   | 3939                       | 100                        | 3012                        | 76 $\pm$ 2                   | 1303                        | 33 $\pm$ 2                   |
| Co-6h   | 3504                       | 100                        | 5734                        | 164 $\pm$ 3                  | 5134                        | 147 $\pm$ 2                  |
| C4-6h   | 4208                       | 100                        | 5356                        | 127 $\pm$ 5                  | 4029                        | 96 $\pm$ 4                   |
| Co-8h   | 3853                       | 100                        | 7334                        | 190 $\pm$ 3                  | 8366                        | 217 $\pm$ 4                  |
| C4-8h   | 4221                       | 100                        | 7776                        | 184 $\pm$ 4                  | 6494                        | 154 $\pm$ 3                  |

  

| Kinetic | Tubulin integrated density | Relative intensity tubulin | Aurora B integrated density | Relative intensity aurora B |
|---------|----------------------------|----------------------------|-----------------------------|-----------------------------|
| Co-8h   | 1630                       | 100                        | 3370                        | 207 $\pm$ 8                 |
| C4-8h   | 1359                       | 100                        | 3198                        | 235 $\pm$ 8                 |

**Table S2. Cell cycle analysis.** The percentage of HeLa cells in each cell cycle phase after 4, 8, 10, 12, 25 and 30 hours under C4 (3  $\mu$ M) treatment or DMSO (Control) : <2N represents apoptotic cells; 2N for cells in G0/G1; S for cells in S phase; 4N for cells in G2/M and >4N for polyploid cells.

| DNA                                   | <2N | 2N | S  | 4N | >4N |
|---------------------------------------|-----|----|----|----|-----|
| <b>4-hour control</b>                 | 1   | 13 | 53 | 33 | 0   |
| <b>4-hour C4 3 <math>\mu</math>M</b>  | 1   | 16 | 58 | 24 | 1   |
| <b>8-hour control</b>                 | 4   | 16 | 4  | 74 | 2   |
| <b>8-hour C4 3 <math>\mu</math>M</b>  | 4   | 12 | 14 | 67 | 3   |
| <b>10-hour control</b>                | 1   | 62 | 3  | 34 | 0   |
| <b>10-hour C4 3 <math>\mu</math>M</b> | 4   | 25 | 5  | 63 | 3   |
| <b>12-hour control</b>                | 3   | 76 | 4  | 15 | 2   |
| <b>12-hour C4 3 <math>\mu</math>M</b> | 2   | 50 | 4  | 41 | 3   |
| <b>25-hour control</b>                | 2   | 42 | 13 | 39 | 4   |
| <b>25-hour C4 3 <math>\mu</math>M</b> | 5   | 48 | 20 | 25 | 2   |
| <b>30-hour control</b>                | 2   | 65 | 7  | 22 | 4   |
| <b>30-hour C4 3 <math>\mu</math>M</b> | 7   | 54 | 13 | 23 | 3   |
